# Supplementary material
Source: Springer Nature journal article supplement (https://www.springermedizin.de/resource/supplementary/12916_2012_765_MOESM9_ESM.pdf/9598702)

# A Hippocampus

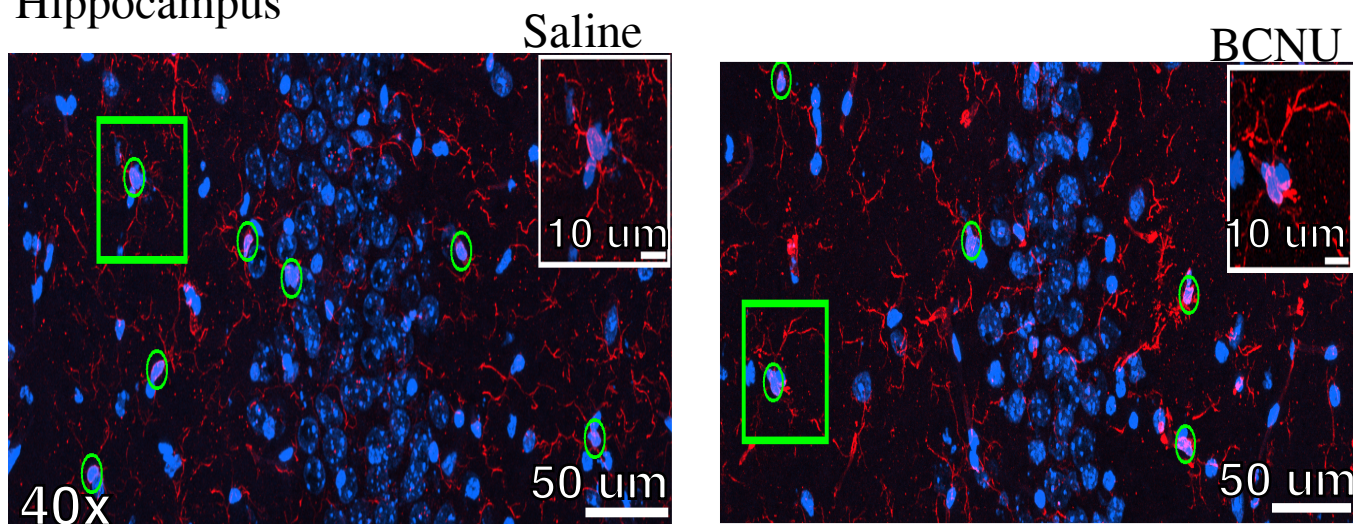

# B Motor cortex

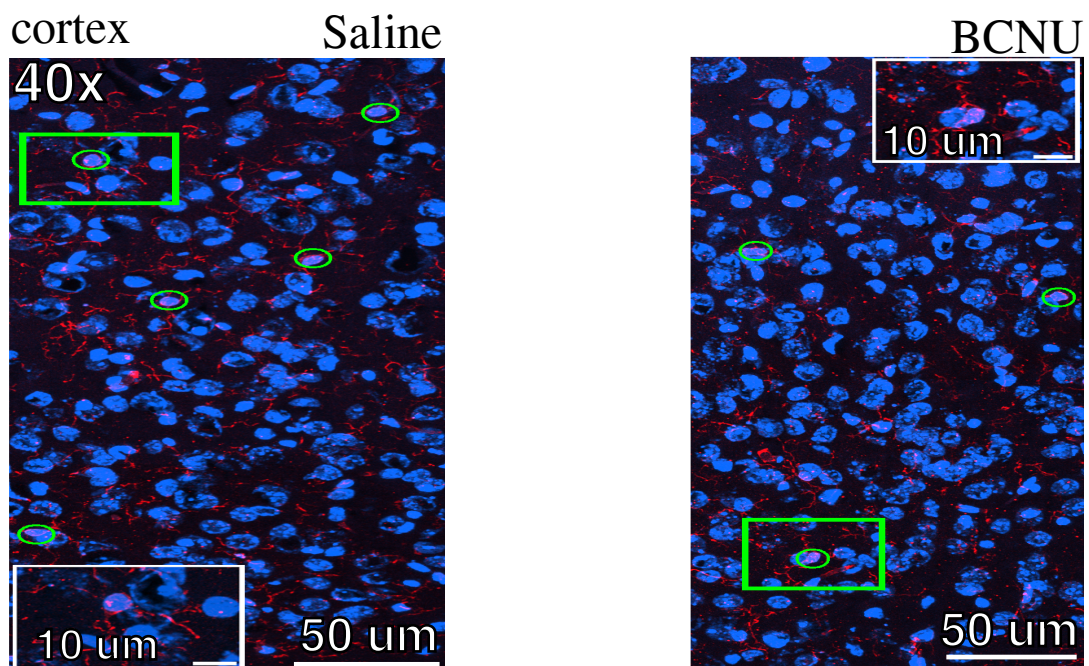

# C Quantitation

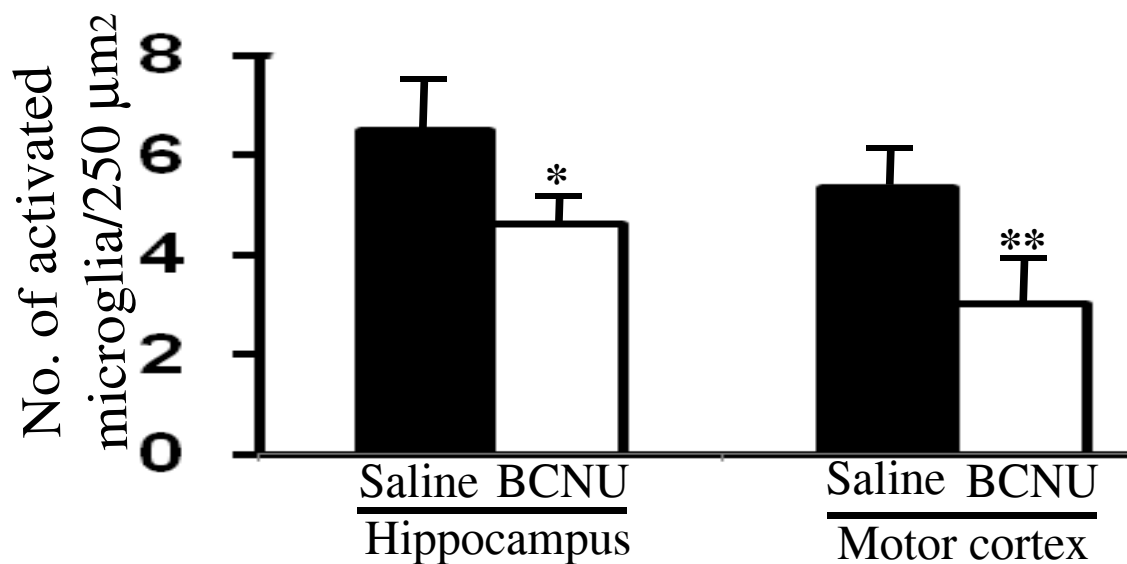

Supplement: MOESM9 [file 9598702]
